# Supplementary material
Source: HighWire-hosted journal article supplement (https://bmjopen.bmj.com/content/12/8/e058403)
Supplement: inline-supplementary-material-1 [file inline-supplementary-material-1.xlsx]

## Sheet: App 1. Search strategy
	This search strategy was part of a scoping review on perceived aduacy of staffing. The results were published in van der Mark et al. (2020).
	Database	Key	Range of years
	PubMed	("Personnel Staffing and Scheduling"[Mesh:noexp] OR staffing adequacy OR inadequate staffing OR staffing inadequacy OR adequate staffing OR requirements for nursing resources[tiab]) AND ("Attitude of Health Personnel"[Mesh:NoExp] OR perception*[tiab] OR perceive*[tiab]) AND ("Nursing Staff"[Mesh] OR "Nurses"[Mesh] OR nurs*[tiab])	1966 - 2019
	Embase	(health care personnel management/ or hospital personnel management/ or nurse patient ratio/ OR ((Staffing ADJ5 (inadequate OR adequate OR inadequacy OR adequacy)) OR requirements for nursing resources).ti,ab,kw.) AND (nurse attitude/ OR (perception* OR perceive*).ti,ab,kw.) AND (exp nurse/ or nursing staff/ OR nurs*.ti,ab,kw)	1978 - 2019
	CINAHL	((MH "Personnel Staffing and Scheduling+") OR TI ( staffing adequacy OR inadequate staffing OR staffing inadequacy OR adequate staffing OR requirements for nursing resources ) OR AB ( staffing adequacy OR inadequate staffing OR staffing inadequacy OR adequate staffing OR requirements for nursing resources )) AND ((MH "Nurse Attitudes") OR TI ( perception* OR perceive* ) OR AB ( perception* OR per…	1984 - 2019
	Business Source Complete	(DE "WORKFORCE planning" OR TI ( staffing adequacy OR inadequate staffing OR staffing inadequacy OR adequate staffing OR requirements for nursing resources ) OR AB ( staffing adequacy OR inadequate staffing OR staffing inadequacy OR adequate staffing OR requirements for nursing resources )) AND ((DE "EMPLOYEE attitudes" OR DE "JOB involvement" OR DE "JOB satisfaction") OR TI ( perception* OR perc…	1976 - 2018
